# Supplementary material for: HIV Infection Disrupts the Sympatric Host–Pathogen Relationship in Human Tuberculosis
Source: PubMed Central journal article supplement (PMC3591267; doi:10.1371/journal.pgen.1003318), 2013-03-07

**Figure S2.** Distribution of tuberculosis (TB) cases included in the study, by place of birth and HIV status. +, HIV-infected TB cases; -, HIV-negative TB cases.

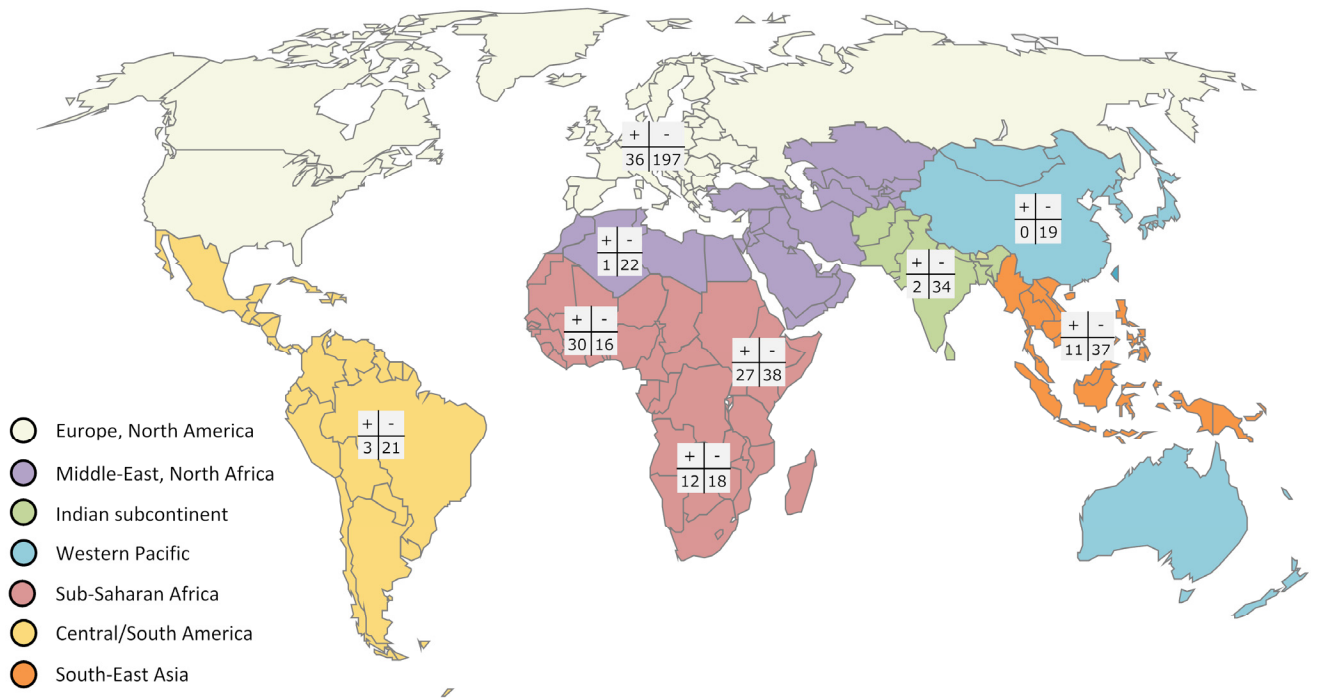

Supplement: pgen.1003318.s002.pdf [file pgen.1003318.s002.pdf]
