# Supplementary material for: HIV Infection Disrupts the Sympatric Host–Pathogen Relationship in Human Tuberculosis
Source: PubMed Central journal article supplement (PMC3591267; doi:10.1371/journal.pgen.1003318), 2013-03-07
Supplement: pgen.1003318.s004.pdf [file pgen.1003318.s004.pdf]

**Table S2.** Crude and adjusted analysis comparing HIV-infected and HIV-negative tuberculosis patients born in Europe (n=233) across the four most frequent *Mycobacterium tuberculosis* lineages.

| Main lineage | Unadjusted         |         | Adjusted           |         |
|--------------|--------------------|---------|--------------------|---------|
|              | OR (95% CI)        | P value | OR (95% CI)        | P value |
| Lineage 1    | 7.0 (0.42-114.6)   | 0.17    | 6.15 (0.30-125.53) | 0.24    |
| Lineage 2    | 4.6 (1.23-17.51)   | 0.023   | 3.22 (0.80-13.04)  | 0.1     |
| Lineage 3    | 13.93 (2.43-79.71) | 0.003   | 12.54 (2.04-77.21) | 0.006   |
| Lineage 4    | 1 (ref)            | -       | 1 (ref)            | -       |

95% CI, 95% confidence interval; OR, Odds Ratio

Model was adjusted for age, sex, and being born in Switzerland

Lineage 1: Indo-Oceanic lineage; Lineage 2: East-Asian lineage (includes Beijing strains); Lineage 3: Delhi/CAS; Lineage 4: Euro-American lineage
