# Supplementary material for: HIV Infection Disrupts the Sympatric Host–Pathogen Relationship in Human Tuberculosis
Source: PubMed Central journal article supplement (PMC3591267; doi:10.1371/journal.pgen.1003318), 2013-03-07
Supplement: pgen.1003318.s005.pdf [file pgen.1003318.s005.pdf]

**Table S3.** Associations of sociodemographic and clinical factors with tuberculosis with an allopatric *Mycobacterium tuberculosis* strain among HIV-infected European patients (n=36).

| Variables adjusted for <sup>1</sup>                        | OR (95% CI)       | P value           |
|------------------------------------------------------------|-------------------|-------------------|
| Male sex                                                   | 0.85 (0.17-4.17)  | 0.84              |
| Age groups, years                                          |                   | 0.29              |
| 16-49                                                      | 1.0 (ref)         |                   |
| ≥50                                                        | 0.54 (0.18-1.67)  |                   |
| Swiss-born                                                 | 6.64 (0.90-∞)     | 0.066             |
| Frequent travelling                                        | 10.0 (1.69-59.31) | 0.011             |
| Immunosuppression <sup>3</sup>                             | 1.91 (0.21-∞)     | 0.60              |
| Contact with foreign-born                                  |                   | 0.43 <sup>2</sup> |
| No or unknown contact                                      | 1.0 (ref)         |                   |
| Foreign contact                                            | 2.56 (0-99.67)    |                   |
| Swiss contact                                              | 0.50 (0-4.47)     |                   |
| Degree of immunodeficiency (nadir CD4 cell count cells/μl) |                   | 0.36 <sup>2</sup> |
| ≥200                                                       | 1.0 (ref)         |                   |
| 50-199                                                     | 1.38 (0.21-9.24)  |                   |
| <50                                                        | 2.70 (0.33-21.98) |                   |

<sup>1</sup> See Figure S2 for a graphical overview

<sup>2</sup> P values of linear tests for trend

<sup>3</sup> Immunosuppression other than HIV infection (use of anti-TNF blockers, malignancy, organ transplantation, use of steroids or methotrexate)

OR, odds ratio; 95% CI, 95% confidence interval
