# Supplementary material for: HIV Infection Disrupts the Sympatric Host–Pathogen Relationship in Human Tuberculosis
Source: PubMed Central journal article supplement (PMC3591267; doi:10.1371/journal.pgen.1003318), 2013-03-07
Supplement: pgen.1003318.s006.pdf [file pgen.1003318.s006.pdf]

**Table S4.** Associations between HIV infection and tuberculosis with an allopatric *Mycobacterium tuberculosis* strain among European patients (n=233) in the context of other potential factors influencing this association, using Bayesian statistics and presented as unadjusted or adjusted odds ratios.

| <b>Variables adjusted for <sup>1</sup></b>                                                                      | <b>OR</b> | <b>(95% CI)</b> | <b>P value</b> |
|-----------------------------------------------------------------------------------------------------------------|-----------|-----------------|----------------|
| Unadjusted                                                                                                      | 6.14      | (2.32-16.24)    | <0.0001        |
| Age, sex, Swiss-born                                                                                            | 6.06      | (2.06-17.79)    | 0.0010         |
| Frequent travelling                                                                                             | 4.07      | (1.42-11.66)    | <0.0001        |
| Immunosuppression <sup>2</sup>                                                                                  | 6.20      | (2.34-16.43)    | <0.0001        |
| Age, sex, Swiss-Born, frequent travelling, contact with foreign-born population                                 | 4.33      | (1.45-13.91)    | 0.014          |
| Immunosuppression <sup>2</sup>                                                                                  | 6.20      | (2.34-16.43)    | <0.0001        |
| Age, sex, Swiss-born, frequent travelling, contact with foreign-born population, immunosuppression <sup>2</sup> | 4.31      | (1.34-13.87)    | 0.014          |

<sup>1</sup> See Figure 2 for a graphical overview

<sup>2</sup> Immunosuppression other than HIV infection (use of anti-TNF blockers, malignancy, organ transplantation, use of steroids or methotrexate)

OR, odds ratio; 95% CI, 95% confidence interval
