# Supplementary material for: HIV Infection Disrupts the Sympatric Host–Pathogen Relationship in Human Tuberculosis
Source: PubMed Central journal article supplement (PMC3591267; doi:10.1371/journal.pgen.1003318), 2013-03-07
Supplement: pgen.1003318.s007.pdf [file pgen.1003318.s007.pdf]

**Table S5.** Association between the degree of immunodeficiency and tuberculosis with an allopatric *Mycobacterium tuberculosis* among European patients (n=233) using Bayesian statistics.

| Degree of immunodeficiency                  | Unadjusted |              |         | Adjusted |              |         |
|---------------------------------------------|------------|--------------|---------|----------|--------------|---------|
|                                             | OR         | 95% OR       | P value | OR       | 95% OR       | P value |
| Nadir CD4 T cell count (CD4 cells/ $\mu$ l) |            |              | <0.0001 |          |              | 0.0054  |
| HIV-negative                                | 1.0        | (ref)        |         | 1.0      | (ref)        |         |
| ≥200                                        | 3.36       | (0.68-16.55) |         | 1.83     | (0.34-9.94)  |         |
| 50-199                                      | 4.98       | (1.43-17.37) |         | 4.11     | (0.93-18.13) |         |
| <50                                         | 8.87       | (1.96-40.23) |         | 6.65     | (1.12-39.34) |         |

Model was adjusted for age, sex, Swiss-born, frequent travelling, contact with foreign-born population, and not HIV-associated immunosuppression (see Figure 2 for a graphical overview)

P values of linear tests for trend are shown
