# Supplementary material for: HIV Infection Disrupts the Sympatric Host–Pathogen Relationship in Human Tuberculosis
Source: PubMed Central journal article supplement (PMC3591267; doi:10.1371/journal.pgen.1003318), 2013-03-07
Supplement: pgen.1003318.s008.pdf [file pgen.1003318.s008.pdf]

**Table S6.** Comparing the main phylogenetic *Mycobacterium tuberculosis* lineages, by HIV status and region of birth.

| Region and HIV status               | No. | Main lineages, n (%) |           |           |            |          | P value <sup>1</sup> |
|-------------------------------------|-----|----------------------|-----------|-----------|------------|----------|----------------------|
|                                     |     | 1                    | 2         | 3         | 4          | 5+6      |                      |
| <b>European region</b>              | 233 |                      |           |           |            |          | 0.0010               |
| HIV-infected                        | 36  | 1 (2.8)              | 4 (11.1)  | 4 (11.1)  | 27 (75.0)  | -        |                      |
| HIV-negative                        | 197 | 1 (0.5)              | 6 (3.1)   | 2 (1.0)   | 188 (95.4) | -        |                      |
| <b>Sub-Saharan Africa (overall)</b> | 131 |                      |           |           |            |          | 0.012                |
| HIV-infected                        | 59  | 2 (3.4)              | 2 (3.4)   | 1 (1.7)   | 50 (84.8)  | 6 (8.3)  |                      |
| HIV-negative                        | 72  | 4 (5.6)              | 0 (0)     | 12 (16.7) | 50 (69.4)  | 4 (6.8)  |                      |
| <b>Eastern Africa</b>               | 55  |                      |           |           |            |          | 0.12                 |
| HIV-infected                        | 17  | 1 (5.9)              | 1 (5.9)   | 1 (5.9)   | 14 (82.4)  | -        |                      |
| HIV-negative                        | 38  | 3 (7.9)              | 0 (0)     | 10 (26.3) | 25 (65.8)  | -        |                      |
| <b>West Africa</b>                  | 46  |                      |           |           |            |          | 0.11                 |
| HIV-infected                        | 30  | 1 (3.3)              | -         | -         | 26 (86.7)  | 3 (10.0) |                      |
| HIV-negative                        | 16  | 1 (6.3)              | -         | -         | 10 (62.5)  | 5 (31.3) |                      |
| <b>Southern Africa</b>              | 30  |                      |           |           |            |          | 0.55                 |
| HIV-infected                        | 12  | -                    | 1 (8.3)   | 0 (0)     | 10 (83.3)  | 1 (8.3)  |                      |
| HIV-negative                        | 18  | -                    | 0 (0)     | 2 (11.1)  | 15 (83.3)  | 1 (5.6)  |                      |
| <b>South-East Asia</b>              | 48  |                      |           |           |            |          | 0.55                 |
| HIV-infected                        | 11  | 7 (63.6)             | 4 (36.4)  | -         | 0 (0)      | -        |                      |
| HIV-negative                        | 37  | 18 (48.7)            | 14 (37.8) | -         | 5 (13.5)   | -        |                      |
| <b>Indian Subcontinent</b>          | 36  |                      |           |           |            |          | 0.59                 |
| HIV-infected                        | 2   | 1 (50.0)             | 0 (0)     | 0 (0)     | 1 (50.0)   | -        |                      |
| HIV-negative                        | 34  | 8 (23.5)             | 3 (8.8)   | 13 (38.2) | 10 (29.4)  | -        |                      |
| <b>Central- and South America</b>   | 24  |                      |           |           |            |          | 0.13                 |
| HIV-infected                        | 3   | -                    | 1 (33.3)  | -         | 2 (6.7)    | -        |                      |
| HIV-negative                        | 21  | -                    | 0 (0)     | -         | 21 (100)   | -        |                      |
| <b>Middle East / North Africa</b>   | 27  |                      |           |           |            |          | 0.99                 |
| HIV-infected                        | 1   | 0 (0)                | 0 (0)     | -         | 1 (100)    | -        |                      |
| HIV-negative                        | 26  | 1 (3.9)              | 5 (19.2)  | -         | 20 (76.9)  | -        |                      |
| <b>Western Pacific</b>              | 19  |                      |           |           |            |          | -                    |
| HIV-negative                        | 19  | -                    | 15 (79.0) | 1 (5.2)   | 3 (15.8)   | -        |                      |

<sup>1</sup> Fisher's exact test

Lineage 1: Indo-Oceanic lineage; Lineage 2: East-Asian lineage (includes Beijing strains); Lineage 3: Delhi/CAS; Lineage 4: Euro-American lineage; Lineages 5 and 6: West African lineages
