# Supplementary material for: HIV Infection Disrupts the Sympatric Host–Pathogen Relationship in Human Tuberculosis
Source: PLOS journal article supplement (doi:10.1371/journal.pgen.1003318), 2013-03-07
Supplement: S3 (10.1371/journal.pgen.1003318.s003) [file journal.pgen.1003318.s003]

**Table S1.** Distribution of the main phylogenetic *Mycobacterium tuberculosis* lineages according to molecular clusters involving either non-European-born tuberculosis (TB) cases only, European-born TB cases only, or mixed clusters involving both non-European-born and European-born TB cases.

| Cluster category | No. of clusters | No. of patients | No. of patients (%) <sup>1</sup> |           |           |           |                           |
|------------------|-----------------|-----------------|----------------------------------|-----------|-----------|-----------|---------------------------|
|                  |                 |                 | Lineage 1                        | Lineage 2 | Lineage 3 | Lineage 4 | HIV-infected <sup>2</sup> |
| Non-EU-born only | 16              | 38              | 5 (13.2)                         | 6 (15.8)  | 5 (13.2)  | 22 (57.9) | 12 (31.6)                 |
| Mixed            | 8               | 26              | 0                                | 0         | 0         | 26 (100)  | 5 (19.2)                  |
| EU-born only     | 11              | 26              | 0                                | 0         | 0         | 26 (100)  | 4 (15.4)                  |

*P* values by Fisher's exact test: <sup>1</sup>  $p < 0.0001$  across lineages and cluster categories; <sup>2</sup>  $p = 0.34$  across HIV status and cluster categories

EU, European

Lineage 1: Indo-Oceanic lineage; Lineage 2: East-Asian lineage (includes Beijing strains); Lineage 3: Delhi/CAS; Lineage 4: Euro-American lineage
